# Supplementary material for: High temperature inhibited the accumulation of anthocyanin by promoting ABA catabolism in sweet cherry fruits
Source: Front Plant Sci. 2023 Feb 13;14:1079292. doi: 10.3389/fpls.2023.1079292 (PMC9968857; doi:10.3389/fpls.2023.1079292)
Supplement: Supplementary file 2 [file Table_2.xlsx]

## Sheet: Sheet1
Supplementary Material S2. The differentially accumulated metabolites identified between NT and HT
Index	Formula	Compounds	Class I	Class II	CAS	Level	NT-3	NT-2	NT-1	HT-3	HT-2	HT-1	VIP	Fold_Change	Log2FC	Type
pmp001287	C8H9N	N-Benzylmethylene isomethylamine	Alkaloids	Alkaloids	-	A	2610800	5423400	3723900	14435000	8216500	10067000	1.63003	2.78263	1.47645	up
Lmtn001630	C14H19NO7	2-β-D-Glucopyranosyloxy-2-phenylacetic acid amide	Alkaloids	Alkaloids	-	B	3487.3	3273.5	2683.3	15978	5079	7455.6	1.50627	3.01909	1.59411	up
mws1580	C20H27NO11	Amygdalin	Alkaloids	Alkaloids	29883-15-6	B	36553	24669	16584	126490	66198	60692	1.60824	3.25656	1.70335	up
pmp001274	C28H48NO7P	2-Hydroxy-5,8,11,14,17-icosapentaenoyloxy]propyl-2-(trimethylammonio)ethyl phosphate	Alkaloids	Alkaloids	-	A	368790	591120	456060	269530	193890	172760	1.66189	0.449289	-1.15428	down
pmn001694	C18H34O5	9,10,13-Trihyroxy-11-octadecadienoic acid	Lipids	Free fatty acids	-	B	14219	36283	28382	12311	7170.2	9149.6	1.53479	0.362948	-1.46216	down
pmb0874	C23H44NO7P	LysoPE 18:2	Lipids	LPE	-	A	6867600	10214000	8366800	5877000	2662500	2662000	1.54286	0.440165	-1.18388	down
pmb0854	C26H48NO7P	LysoPC 18:3	Lipids	LPC	-	A	2140400	3375700	2797900	1366300	1179700	1023100	1.72371	0.429288	-1.21998	down
pmp001251	C26H50NO7P	LysoPC 18:2	Lipids	LPC	-	A	15623000	24174000	19707000	13635000	7331100	6898200	1.55579	0.468276	-1.09457	down
pmp001281	C26H52NO7P	LysoPC 18:1	Lipids	LPC	-	A	4300100	5801000	4631000	2707100	2356100	2272800	1.76059	0.49796	-1.0059	down
pme3207	C6H6O4	Trans,trans-Muconic acid	Organic acids	Organic acids	3588-17-8	B	438590	233520	128600	81594	165890	133530	1.14403	0.475845	-1.07144	down
pme1439	C9H8O3	p-Coumaric acid	Phenolic acids	Phenolic acids	501-98-4	A	170920	81023	151690	387920	496090	365220	1.69122	3.09496	1.62992	up
Lmlp002133	C9H8O3	Trans-p-Hydroxycinnamic acid	Phenolic acids	Phenolic acids	-	B	75224	36470	80514	138660	202860	185440	1.62661	2.74161	1.45503	up
mws0467	C9H10O3	3-(4-Hydroxyphenyl)-propionic acid	Phenolic acids	Phenolic acids	501-97-3	B	9	9	9895.9	9453.8	13990	12767	1.31981	3.65253	1.8689	up
mws2212	C9H8O4	Caffeic acid	Phenolic acids	Phenolic acids	331-39-5	A	664240	611420	667770	1562200	2895300	1974500	1.75489	3.30961	1.72666	up
mws1505	C17H16O4	Phenethyl caffeate	Phenolic acids	Phenolic acids	104594-70-9	B	2958.4	6806.6	8175.3	3224.4	1859	2365.7	1.39972	0.415216	-1.26807	down
pmn001420	C15H18O9	1-O-[(E)-Caffeoyl]-β-D-glucopyranose	Phenolic acids	Phenolic acids	-	A	1311800	2270700	1895900	5424500	4556700	5557300	1.74505	2.83632	1.50402	up
mws0906	C16H22O8	Coniferin	Phenolic acids	Phenolic acids	531-29-3	B	471090	911840	675800	2639000	2298500	1812000	1.72403	3.27848	1.71303	up
mws0011	C17H24O9	Syringin	Phenolic acids	Phenolic acids	118-34-3	B	775280	1438300	840800	3319100	1526400	1520100	1.34552	2.08409	1.05942	up
mws1714	C22H18O12	Chicory acid	Phenolic acids	Phenolic acids	70831-56-0	B	14502	26556	22671	112450	71741	64341	1.72241	3.89983	1.96341	up
mws2160	C23H28O6	Schizandrin B	Lignans and Coumarins	Lignans	61281-37-6	A	9	448.17	662.34	463.23	110240	180850	1.34031	260.429	8.02475	up
pme1194	C9H13N3O4	Deoxycytidine	Nucleotides and derivatives	Nucleotides and derivatives	951-77-9	B	6266	9687.7	6517.4	3867.2	5373.5	1936.2	1.38843	0.49739	-1.00755	down
mws4176	C12H16N2O3	DL-Alanyl-DL-phenylalanine	Amino acids and derivatives	Amino acids and derivatives	1999-45-7	B	9118.8	46601	22737	12598	6715.3	6938.6	1.24065	0.334603	-1.57948	down
pme0264	C10H14N2O5	Thymidine	Nucleotides and derivatives	Nucleotides and derivatives	50-89-5	B	9361.3	48819	30380	7339.6	10082	7502.9	1.34667	0.281441	-1.8291	down
pme3961	C10H13N5O3	Deoxyadenosine	Nucleotides and derivatives	Nucleotides and derivatives	958-09-8	B	11172	77920	47880	8836.3	6070.8	10484	1.40884	0.185374	-2.43149	down
mws1060	C10H12N4O5	9-(β-D-Arabinofuranosyl)hypoxanthine	Nucleotides and derivatives	Nucleotides and derivatives	7013-16-3	B	16912	58559	15624	13315	18420	8260.9	1.05134	0.439057	-1.18752	down
mws0884	C10H12N5O6P	Cyclic AMP	Nucleotides and derivatives	Nucleotides and derivatives	60-92-4	B	11158	14635	15041	26416	27033	31586	1.75892	2.08246	1.05829	up
mws0040	C15H10O4	Chrysin	Flavonoids	Flavonoid	480-40-0	A	36548	82758	77404	30788	32278	33948	1.4279	0.493183	-1.01981	down
Lmyp004617	C21H22O9	Pinocembrin 7-O-β-D-glucoside(Pinocembroside)	Flavonoids	Flavonoid	75829-43-5	B	86620	236160	166580	38365	54903	36992	1.64073	0.266184	-1.9095	down
Hmcp002187	C23H24O13	Limocitrin 3-galactoside	Flavonoids	Flavonoid	-	B	94565	69179	89097	119890	332420	79774	1.00195	2.10442	1.07342	up
HJAP064	C25H24O15	Isorhamnetin O-malonylglucoside	Flavonoids	Flavonoid	-	B	22920	18329	18915	44986	86106	23692	1.34593	2.5727	1.36328	up
mws0918	C16H12O5	Prunetin	Flavonoids	Isoflavones	552-59-0	A	6679.3	17294	24120	2839.2	4032.1	6755.7	1.4583	0.283345	-1.81937	down
mws1002	C17H14O8	Syringetin	Flavonoids	Flavonols	4423-37-4	A	20715	27235	62931	8215	34481	11171	1.08803	0.485809	-1.04154	down
pmb0709	C30H32O20	Quercetin-7-O-malonylhexosyl-hexoside	Flavonoids	Flavonols	-	A	206770	536660	286220	75649	243640	132920	1.28147	0.439187	-1.18709	down
pme2960	C15H12O5	Naringenin chalcone*	Flavonoids	Chalcones	73692-50-9	A	89954	85795	198180	45971	54376	42889	1.55497	0.383057	-1.38437	down
pme0376	C15H12O5	Naringenin*	Flavonoids	Dihydroflavone	480-41-1	A	71365	65441	157080	38814	40876	32685	1.54414	0.382376	-1.38694	down
mws0914	C15H12O5	Pinobanksin*	Flavonoids	Dihydroflavonol	548-82-3	A	69368	76411	182120	41958	46747	33128	1.49565	0.371556	-1.42835	down
mws1094	C15H12O6	Dihydrokaempferol	Flavonoids	Dihydroflavonol	480-20-6	A	10392	8010.9	17606	5846.9	4833.4	5596.2	1.54746	0.452013	-1.14556	down
mws0044	C15H12O7	Dihydroquercetin(Taxifolin)	Flavonoids	Dihydroflavonol	480-18-2	A	705530	858850	490310	241800	234980	234080	1.75025	0.345969	-1.53128	down
pmp000413	C21H20O10	Genistein 8-C-glucoside	Flavonoids	Flavonoid carbonoside	66026-80-0	B	11405	64350	15553	8738	5247	17449	1.05145	0.344263	-1.53842	down
Smlp002532	C20H19O10+	Cyanidin-3-O-arabinoside	Flavonoids	Anthocyanins	27214-72-8	B	1108900	775200	941120	333030	582470	390540	1.64334	0.462279	-1.11316	down
pme3392	C21H21O10+	Pelargonidin-3-O-glucoside	Flavonoids	Anthocyanins	47684-27-5	B	262850	238250	300430	96079	118450	9	1.00017	0.267661	-1.90152	down
pmb0550	C21H21O11+	Cyanidin-3-O-glucoside (Kuromanin)	Flavonoids	Anthocyanins	47705-70-4	A	29949000	27357000	34774000	4895700	7881300	4438000	1.79312	0.186957	-2.41922	down
pmf0203	C22H23O11+	Peonidin-3-O-glucoside	Flavonoids	Anthocyanins	68795-37-9	A	2543300	1886500	3063400	359960	580100	409280	1.78868	0.180075	-2.47333	down
pmb2957	C24H19O10+	Cyanidin-O-syringic acid	Flavonoids	Anthocyanins	-	A	547100	519030	712720	87861	150110	99280	1.79231	0.189589	-2.39905	down
pme1773	C27H31O15+	Cyanidin-3-O-rutinoside (Keracyanin)	Flavonoids	Anthocyanins	28338-59-2	A	1815300	1351600	1816900	590020	942560	547030	1.68131	0.417274	-1.26093	down
Lmtp003079	C28H33O15+	Peonidin-3-O-rutinoside	Flavonoids	Anthocyanins	-	B	15378000	7757500	12325000	3402900	6878600	4786400	1.52495	0.424921	-1.23473	down
pme1777	C27H31O16+	Cyanidin-3,5-O-diglucoside (Cyanin)	Flavonoids	Anthocyanins	2611-67-8	B	555630	358400	477700	183590	290670	208510	1.62396	0.490591	-1.02741	down
pmp001282	C28H50NO7P	Propyl2-(trimethylammonio)ethyl phosphate	Others	Others	-	A	476110	644330	494670	317620	263830	224180	1.70964	0.498808	-1.00344	down
